# Supplementary material
Source: PubMed Central journal article supplement (PMC4767985)
Supplement: JCM.02876-15_zjm999094825so1.pdf [file JCM.02876-15_zjm999094825so1.pdf]

Table S1. Classification criteria for the 63 patients with « no final diagnosis of PCP »

| Patients number | Factor of immunosuppression | Clinical signs of progressive pneumonia | Radiological signs of PCP | Other documented etiology of pneumonia | No clinical improvement with <i>Pj</i> specific treatment | Clinical improvement without <i>Pj</i> specific treatment |
|-----------------|-----------------------------|-----------------------------------------|---------------------------|----------------------------------------|-----------------------------------------------------------|-----------------------------------------------------------|
| 10              |                             | x                                       | x                         | x                                      |                                                           |                                                           |
| 8               | x                           | x                                       |                           | x                                      |                                                           |                                                           |
| 7               | x                           |                                         | x                         |                                        |                                                           | x                                                         |
| 6               | x                           |                                         | x                         | x                                      |                                                           |                                                           |
| 6               |                             | x                                       | x                         |                                        |                                                           | x                                                         |
| 5               | x                           |                                         |                           | x                                      |                                                           |                                                           |
| 4               | x                           |                                         | x                         |                                        | x                                                         |                                                           |
| 3               | x                           |                                         |                           |                                        |                                                           | x                                                         |
| 3               |                             | x                                       |                           |                                        |                                                           | x                                                         |
| 2               |                             | x                                       | x                         | x                                      | x                                                         |                                                           |
| 2               | x                           | x                                       |                           |                                        |                                                           | x                                                         |
| 2               |                             | x                                       | x                         |                                        | x                                                         |                                                           |
| 2               |                             |                                         | x                         |                                        |                                                           | x                                                         |
| 1               |                             |                                         | x                         | x                                      |                                                           |                                                           |
| 1               |                             |                                         |                           | x                                      |                                                           |                                                           |
| 1               | x                           | x                                       |                           |                                        | x                                                         |                                                           |

PCP: *Pneumocystis pneumonia*; *Pj*: *Pneumocystis jirovecii*
